## Correction

# Correction: High Rates of Gene Flow by Pollen and Seed in Oak Populations across Europe

The *PLOS ONE* Staff

Reference 69 is incorrect. The correct reference is: Leonarduzzi C, Leonardi S, Menozzi P, Piotti A (2012) Towards an optimal sampling effort for paternity analysis in forest trees: what do the raw numbers tell us? *iForest*, 5: 18-25. DOI: 10.3832/for0606-009

## Reference

1. Gerber S, Chadœuf J, Gugerli F, Lascoux M, Buiteveld J, et al. (2014) High Rates of Gene Flow by Pollen and Seed in Oak Populations across Europe. *PLoS ONE* 9(1): e85130. doi:10.1371/journal.pone.0085130

---

**Citation:** The *PLOS ONE* Staff (2014) Correction: High Rates of Gene Flow by Pollen and Seed in Oak Populations across Europe. *PLoS ONE* 9(2): e91301. doi:10.1371/journal.pone.0091301

**Published:** February 28, 2014

**Copyright:** © 2014 The *PLOS ONE* Staff. This is an open-access article distributed under the terms of the Creative Commons Attribution License, which permits unrestricted use, distribution, and reproduction in any medium, provided the original author and source are credited.
